# Supplementary material for: CRISPR-Cas9 Mediated TSPO Gene Knockout alters Respiration and Cellular Metabolism in Human Primary Microglia Cells
Source: MDPI journal article supplement (doi:10.3390/ijms20133359), 2019-07-09
Supplement: s1 [file s1]

**Supplementary Table 1.** Primers used for PCR, sequencing, cloning, CRISPR/Cas9 and qRT-PCR

| Primer name   | Forward primer (5'-3')    | Reverse primer (5'-3') |
|---------------|---------------------------|------------------------|
| Guide #2      | TCTGCAGGCCGCGTACCAGCGG    | \                      |
| Guide #7      | GCCCGCCATGGGCTTCACGCTGG   | \                      |
| TSPO-ex2      | CTGGAAATGCGTTCACCTCAG     | GCCTGGAGAAGACCCTCTGT   |
| CYP11A1       | TGGGTCGCCTATCACCAGTA      | AAGTTCTTGGTGGCCTCTGG   |
| TSPO          | TCTTTGGTGCCCGACAAAT       | GGTACCAGGCCACGGTAGT    |
| HPRT1         | TTGCTTTCCTTGGTCAGGCA      | ATCCAACACTTCGTGGGGTC   |
| hTSPO-AgeI-F  | atACCGGTgcagccatggccccgcc | \                      |
| hTSPO-EcoRI-R | GAATTCtactctggcagccgccgt  | \                      |
