# Supplementary figures and images for: CRISPR-Cas9 Mediated TSPO Gene Knockout alters Respiration and Cellular Metabolism in Human Primary Microglia Cells
Source: MDPI journal article supplement (doi:10.3390/ijms20133359), 2019-07-09

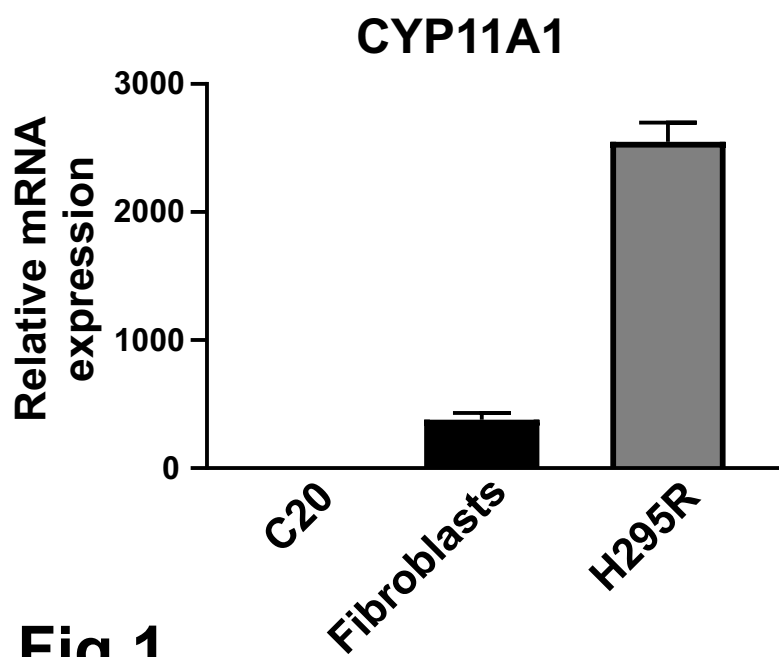

**Supp. Fig 1.**

Supplement: s1 [file s1]
